# Supplementary material for: Study of the Total Antioxidant Capacity (TAC) in Native Cereal−Pulse Flours and the Influence of the Baking Process on TAC Using a Combined Bayesian and Support Vector Machine Modeling Approach
Source: MDPI journal article supplement (doi:10.3390/foods12173208), 2023-08-25
Supplement: s1 [file s1]

**Figure 1.** Biscuits before and after thermal treatment (baking process) at different temperatures (180, 200 and 220 °C and times (0-1500 s).

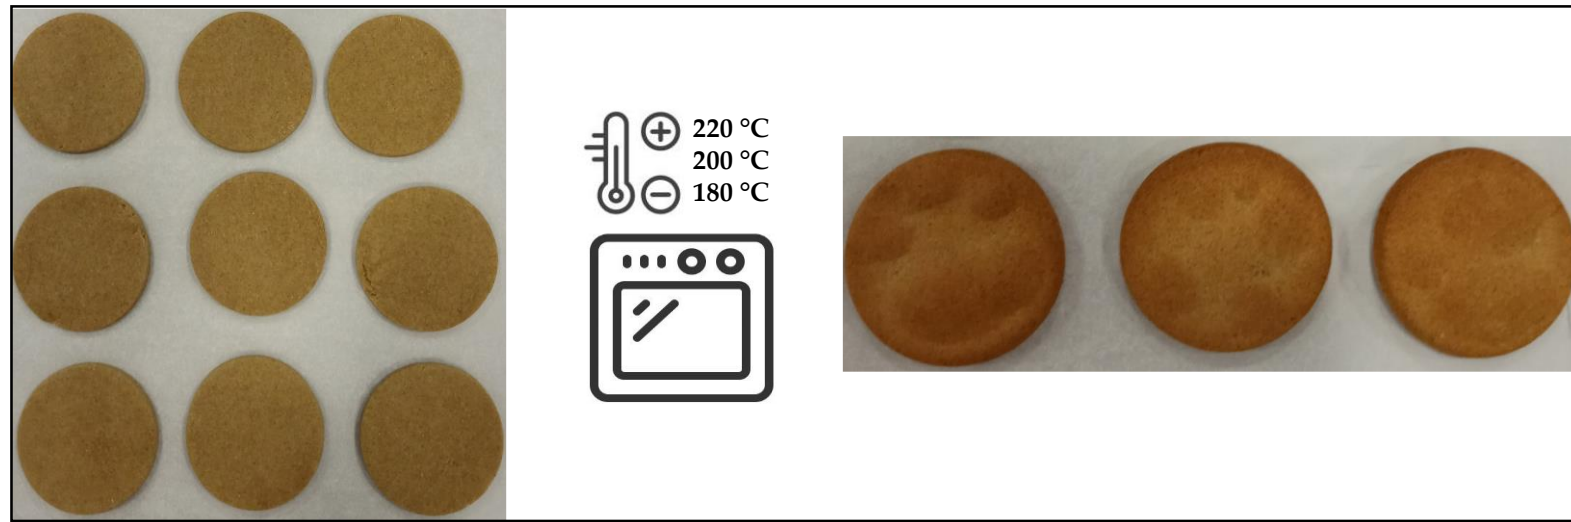

**Figure 2.** Stacked bar graph representing the proximal profile according to grain type. Letters of each colour denotes statistical differences between means (one-way ANOVA, post hoc Duncan's test,  $p \leq 0.05$ ). Data was express in percentage (g 100 g<sup>-1</sup> d.m.).

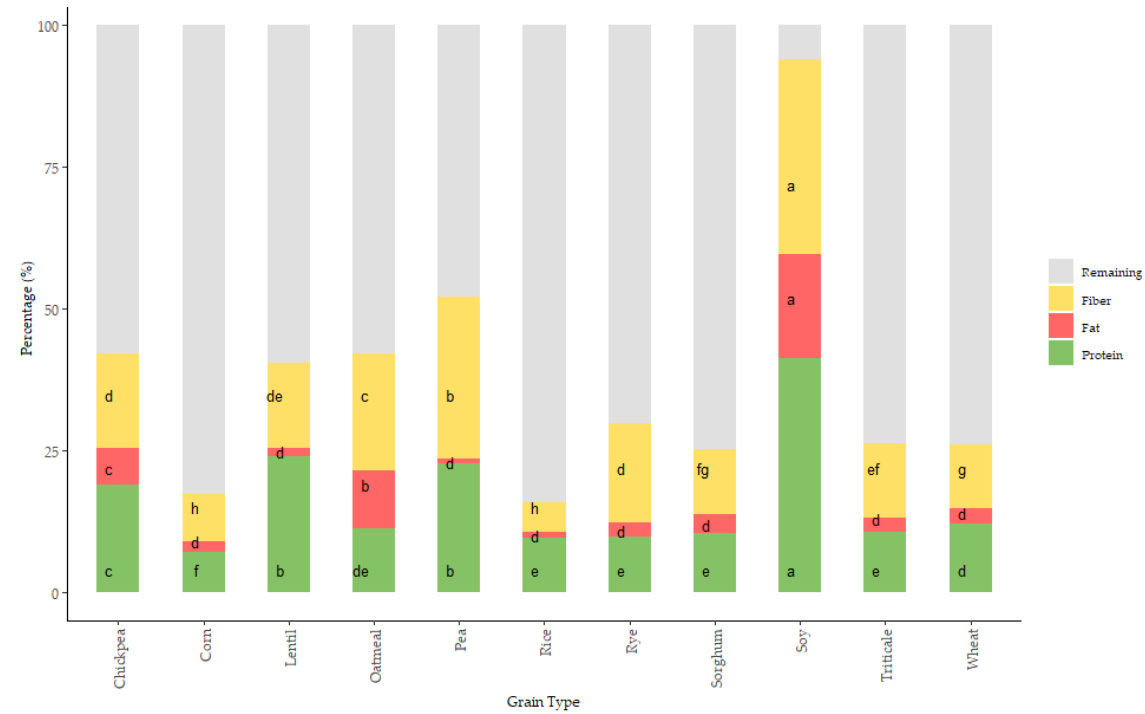

**Figure 3.** Box-Plot distribution for (I) Protein, (II) Fat and (III) Total Dietary Fiber (%) according to the grain. Data are mean values. Letters denotes statistical differences between means (one-way ANOVA, post hoc Duncan's test,  $p \leq 0.05$ ).

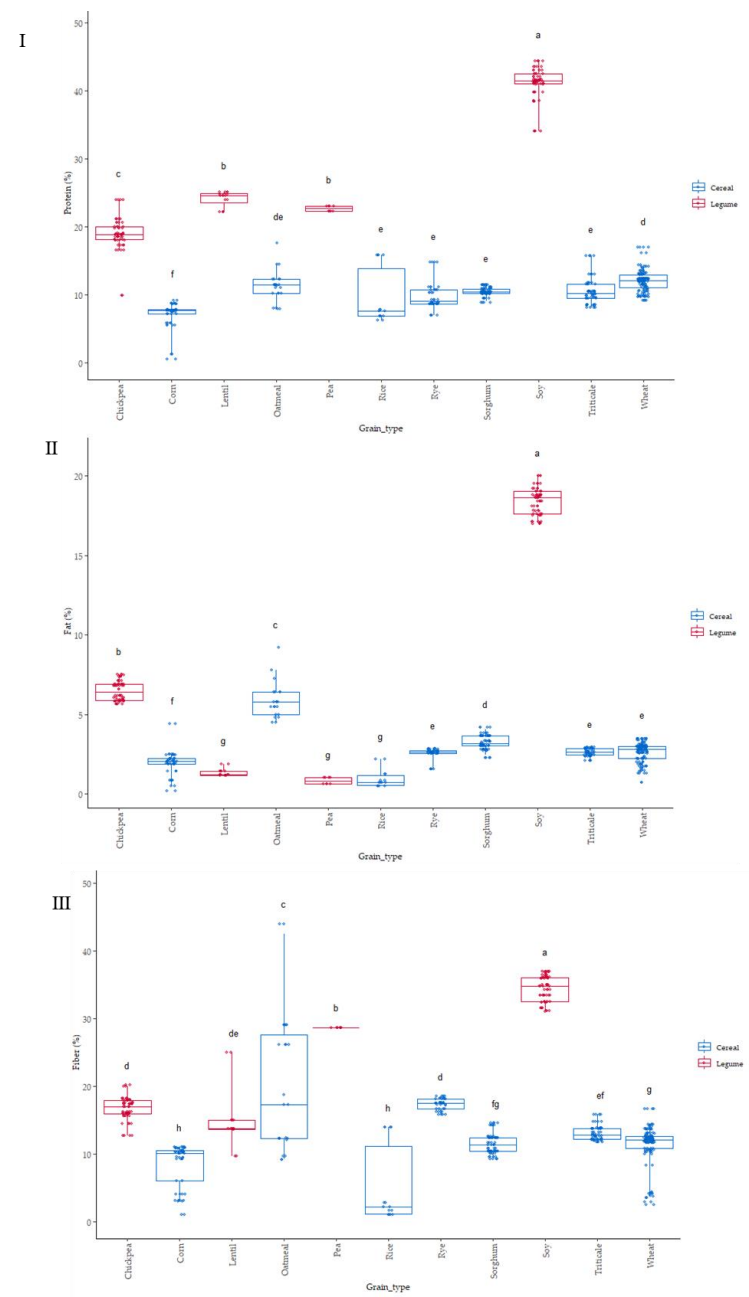

**Figure 4.** Box-Plot distribution for (I) Luminosity, (II) a\* and (III) b\* according to the grain. Data are mean values. Letters denotes statistical differences between means (one-way ANOVA, post hoc Duncan's test,  $p \leq 0.05$ ).

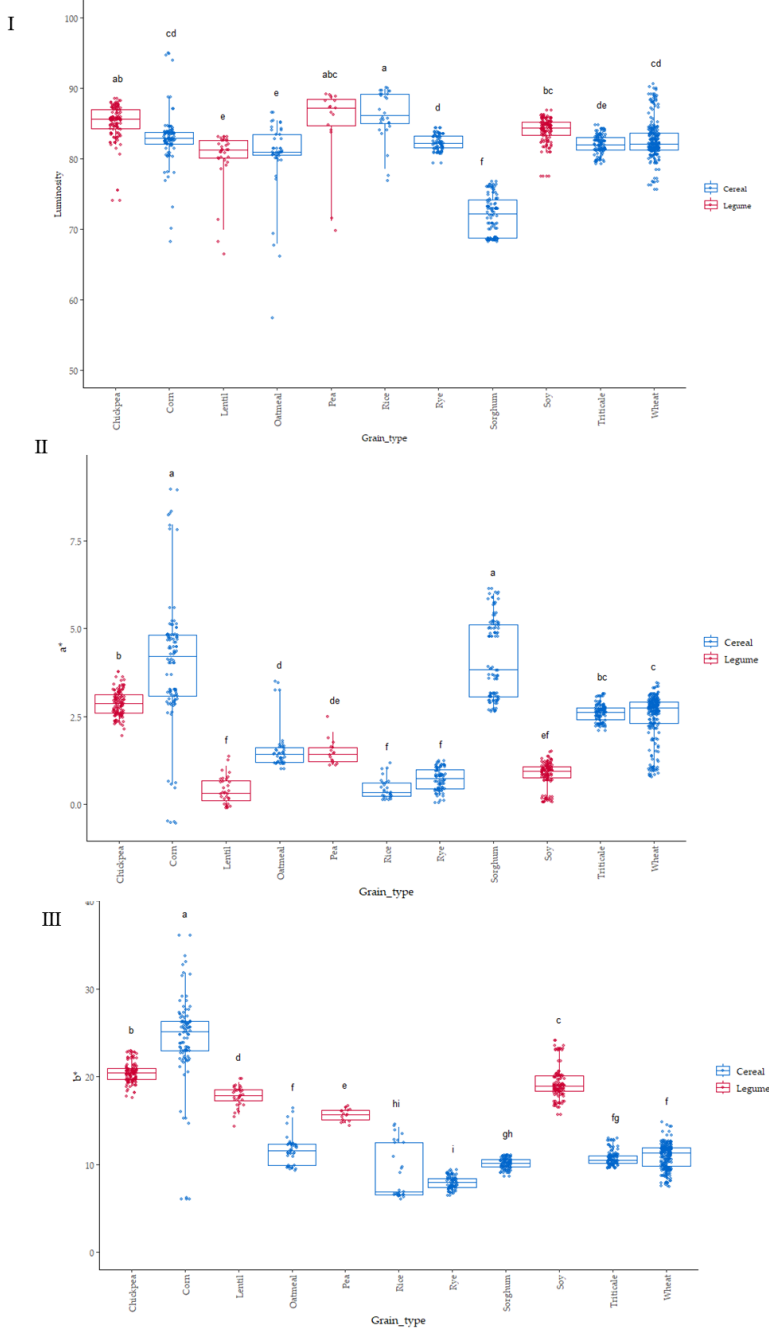

**Figure 5.** Box-Plot distribution for TP (mg GAE 100 g<sup>-1</sup>) according to the grain. Data are mean values. Letters denotes statistical differences between means (one-way ANOVA, post hoc Duncan's test,  $p \leq 0.05$ ).

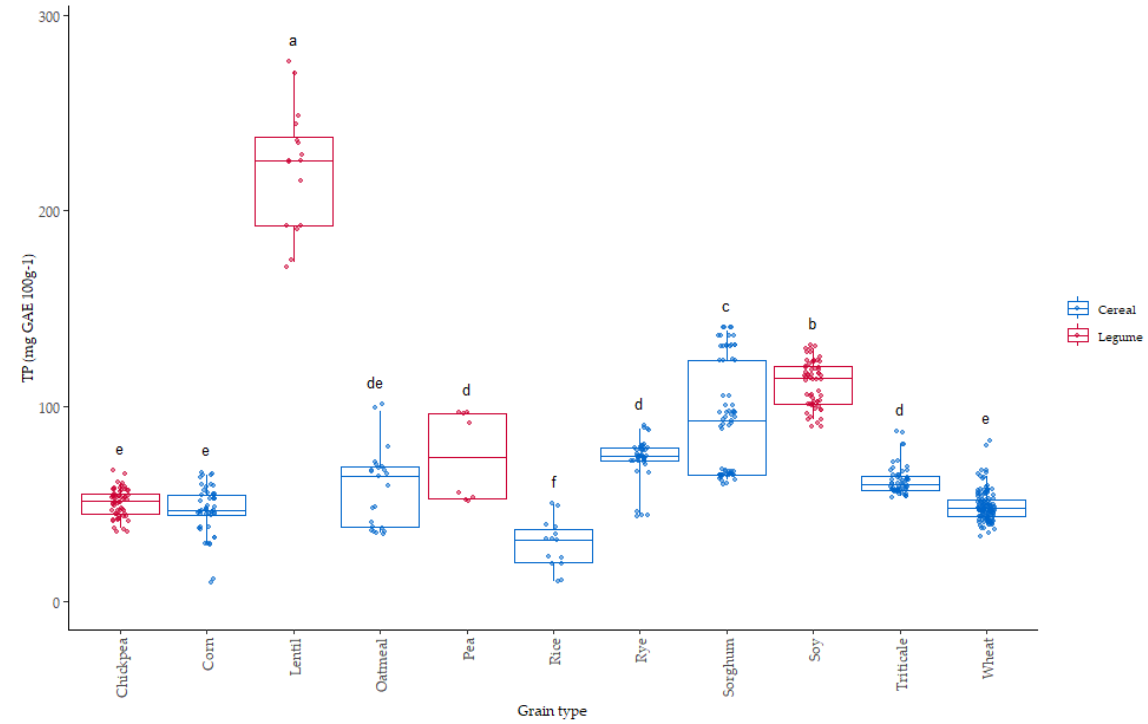

**Figure 6.** Box-Plot distribution for (I) ORAC ( $\mu\text{mol Eq. Trolox } 100 \text{ g}^{-1}$ ) and (II) FRAP ( $\mu\text{mol reduced iron } 100 \text{ g}^{-1}$ ) according to the grain. Data are mean values. Letters denotes statistical differences between means (one-way ANOVA, post hoc Duncan's test,  $p \leq 0.05$ ).

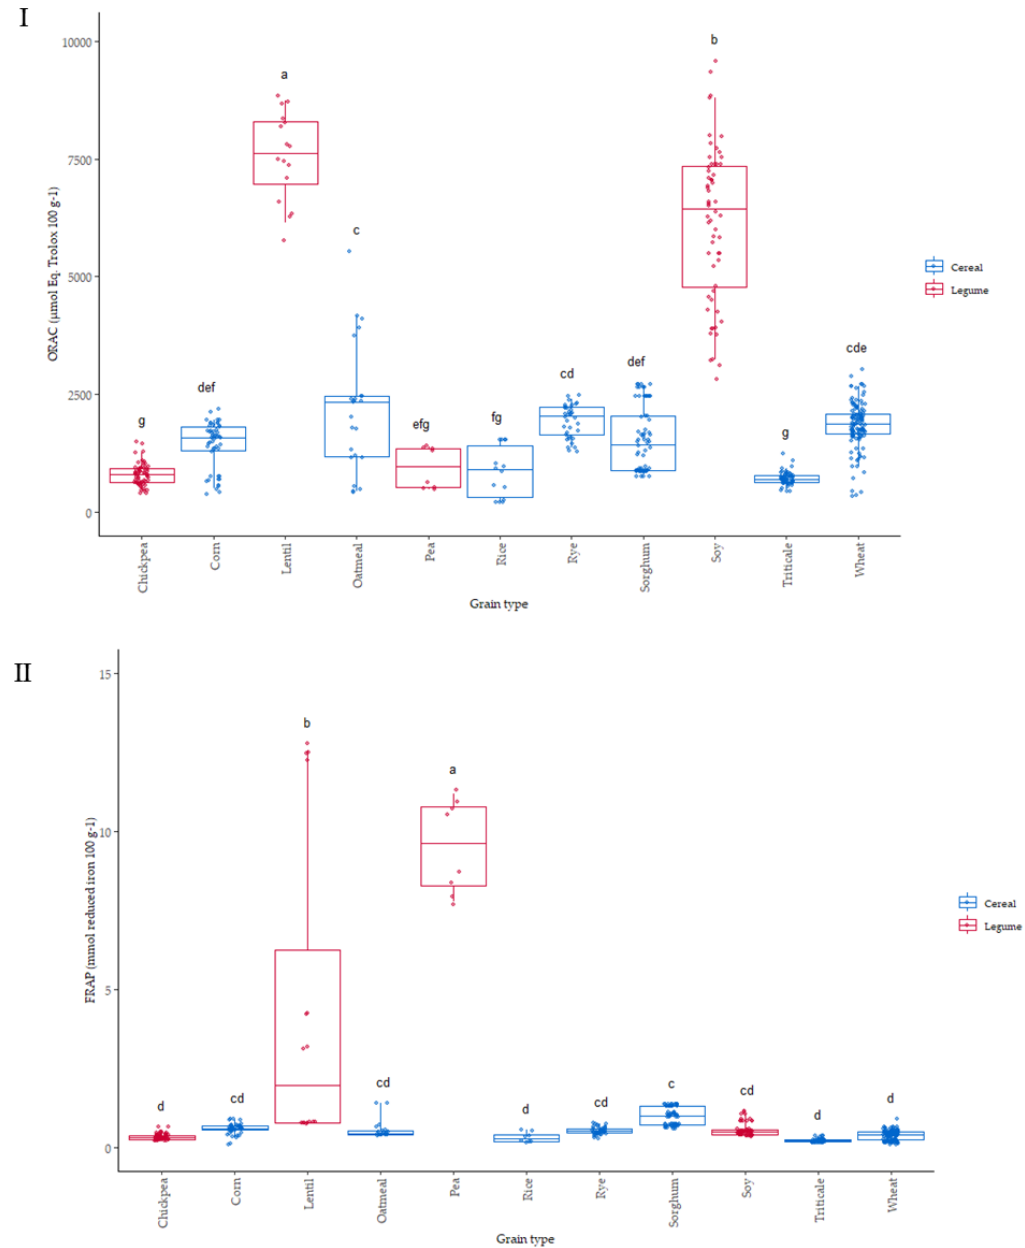

**Figure 7.** Representation of the chemical profile (I) and colourimeter parameters (II) of the grain types based on principal components analysis (PCA).

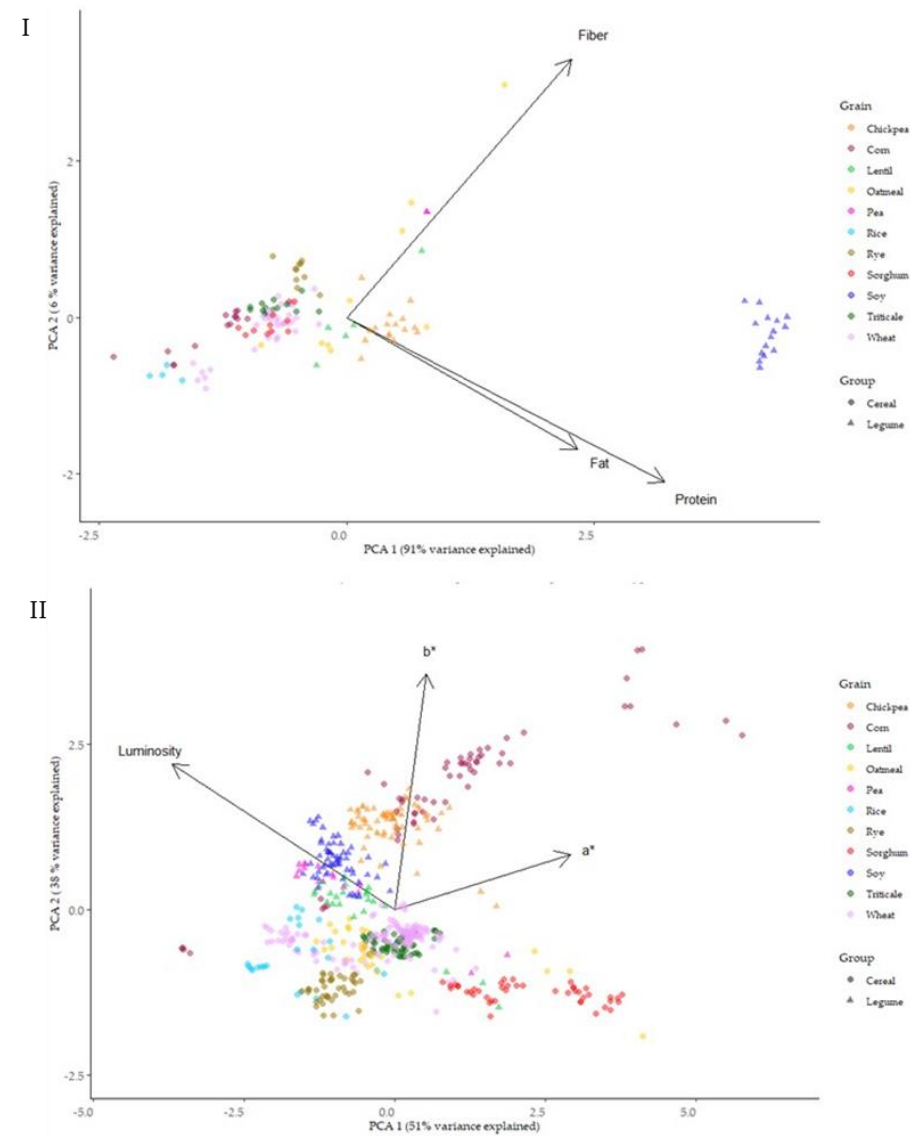

**Figure 8.** T-distributed Stochastic Neighbor Embedding (T-SNE) distribution of type of grains based on their antioxidant parameters (TP, ORAC and FRAP).

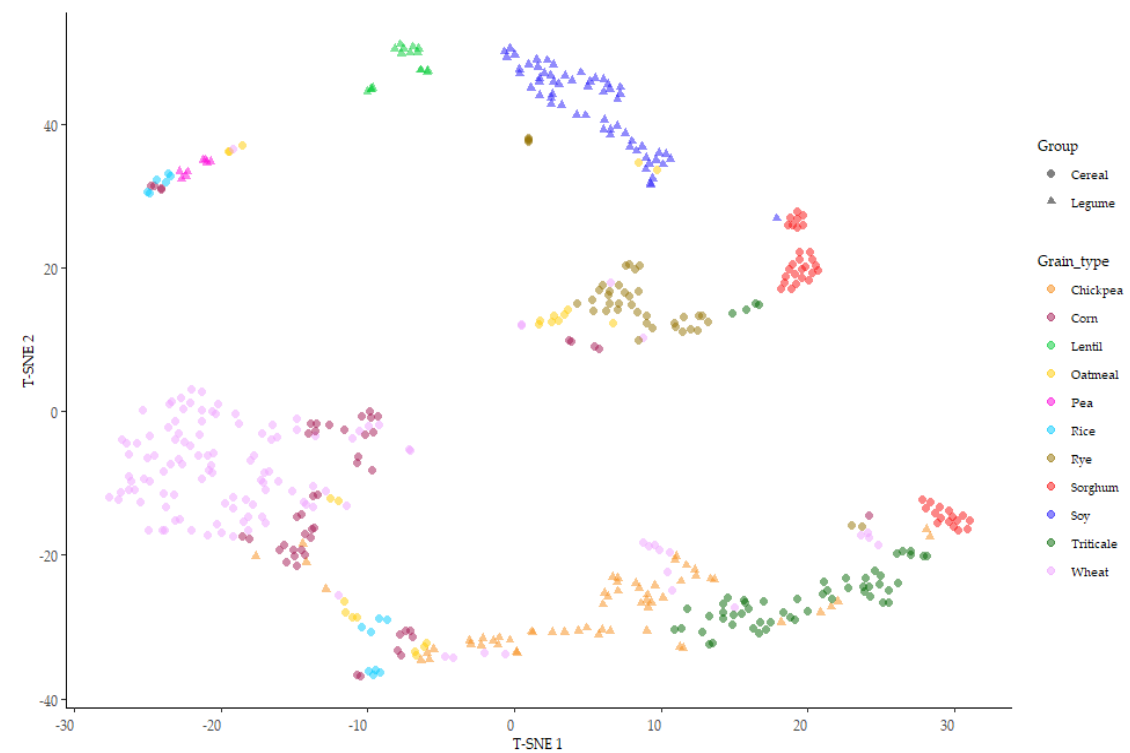



**Figure 9.** Level curves of Total Phenols, ORAC and FRAP, predicted with the first level model for the series according to baking temperature.

I

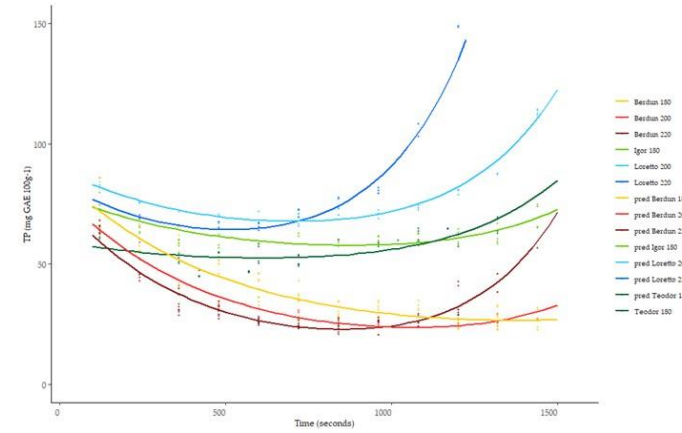

II

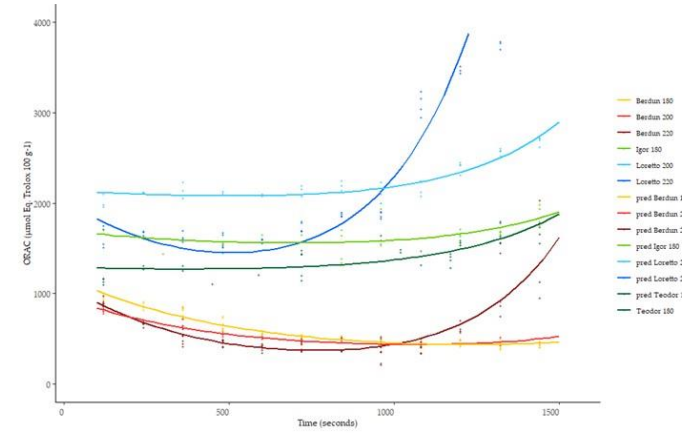

III

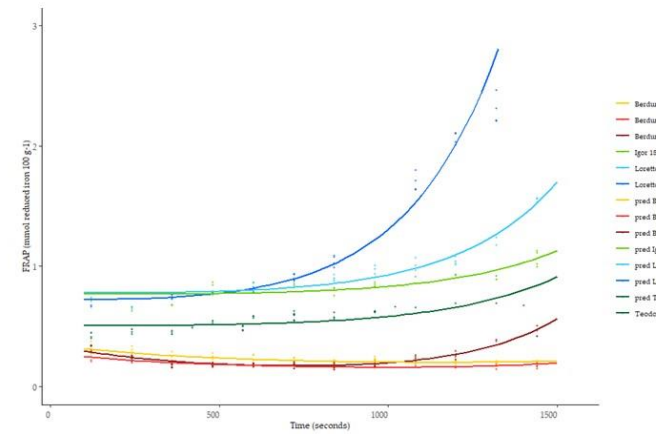

**Figure 10.** Curves of the level of TP(I-III), ORAC (IV-VI) and FRAP (VII-IX) predicted with the second level models for the series according to baking temperature.

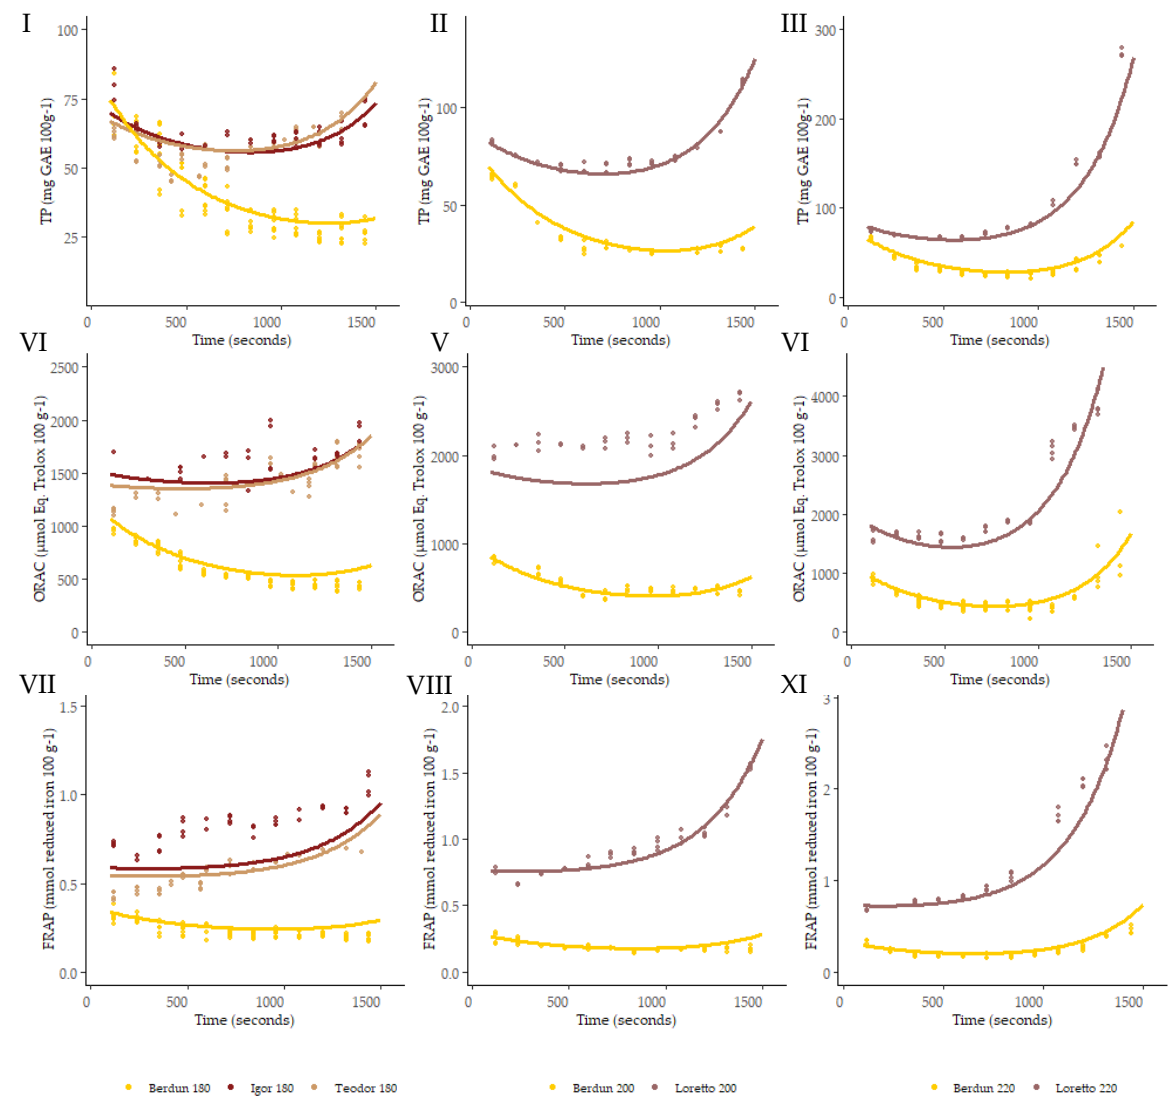

**Figure 11.** Prediction curves for Total phenol content (TP) based on different baking temperatures on wheat (I) and rye (II).

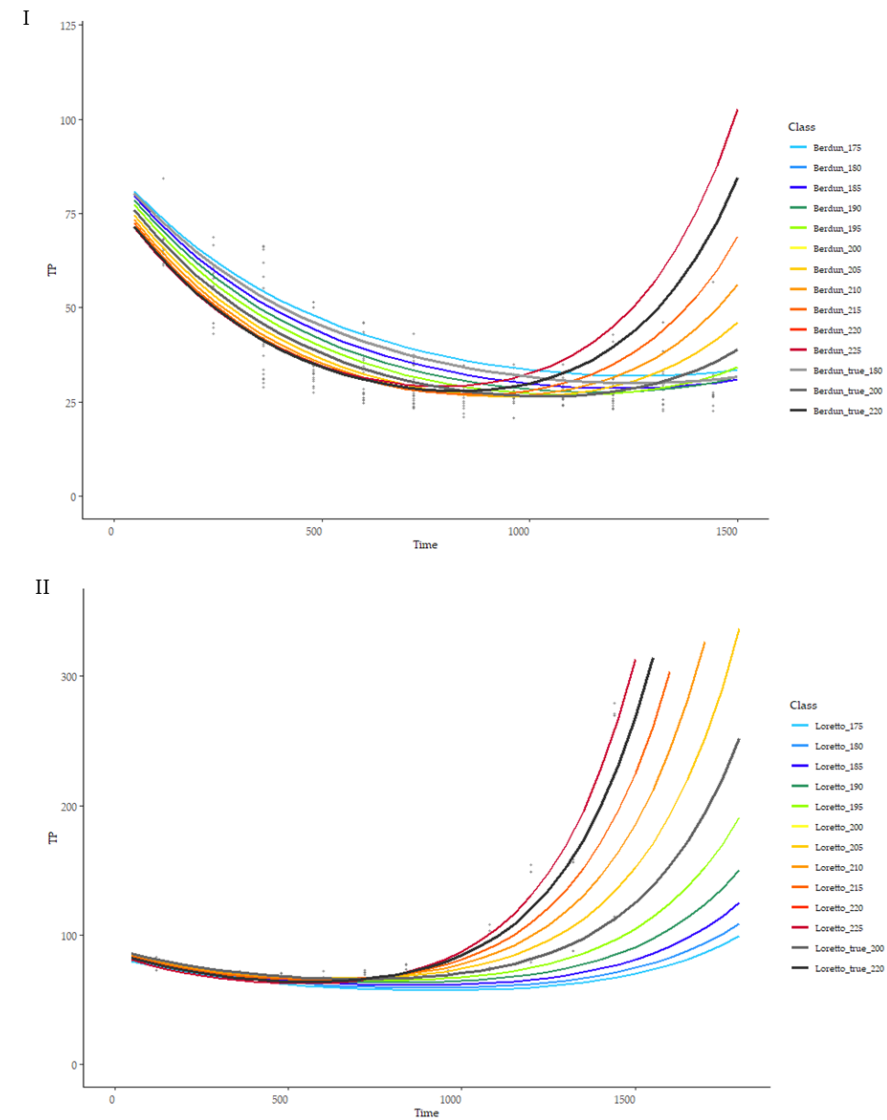

**Figure 12.** Prediction curves for Total phenol content (TP) based on different protein content (g 100 g<sup>-1</sup>) on wheat (I) and rye (II).

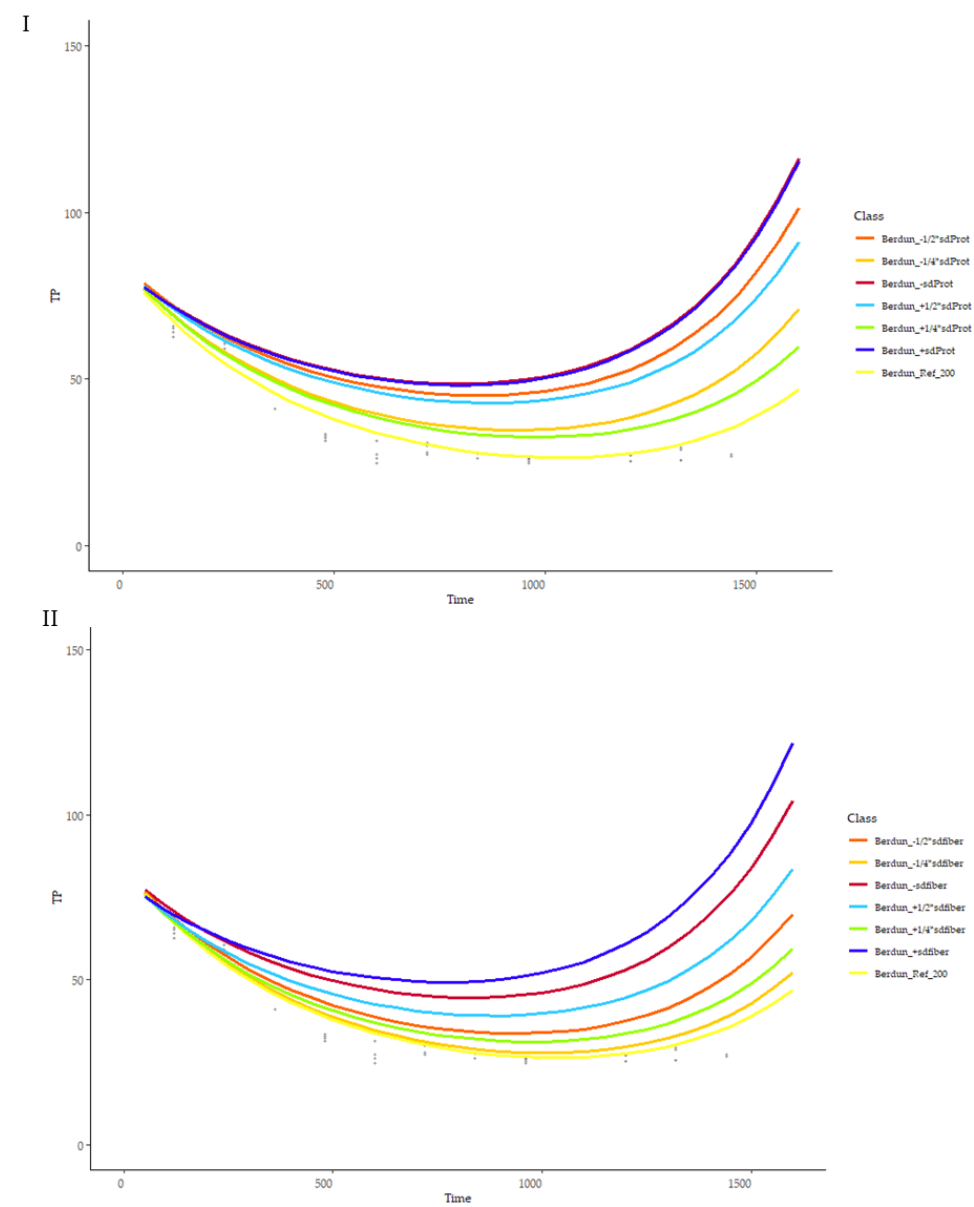

**Figure 13.** Prediction curves for Total phenol content (TP) based on different fiber (g 100 g<sup>-1</sup>) content on wheat (I) and rye (II).

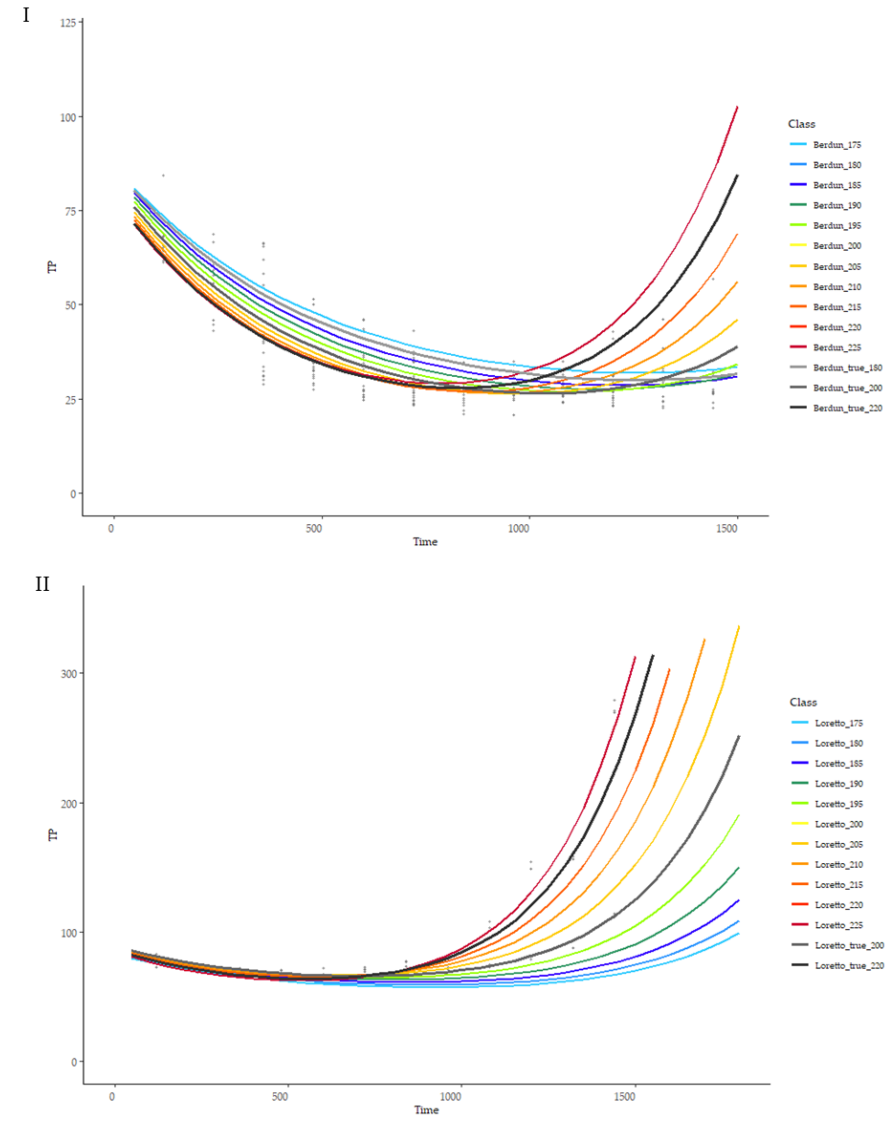

**Figure 14.** Schematic representation of the global model.

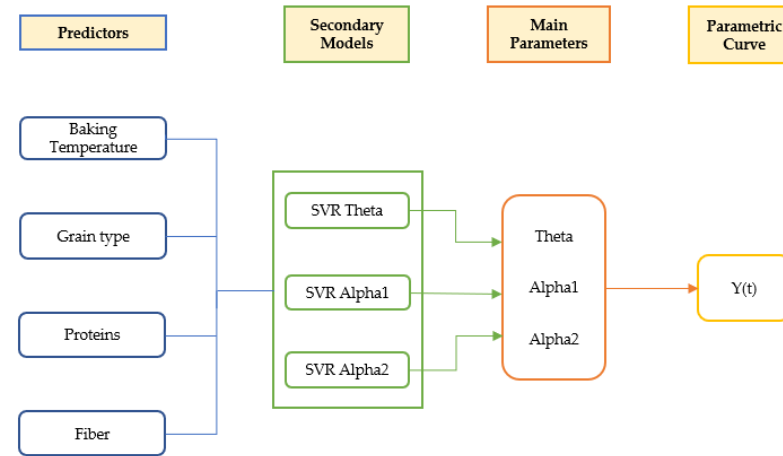

**Table 1.** Values corresponding to the parameters theta, alpha1 and alpha2 of TP model.

| Setting        | TP    |        |        | ORAC  |        |        | FRAP  |        |
|----------------|-------|--------|--------|-------|--------|--------|-------|--------|
|                | Theta | Alpha1 | Alpha2 | Theta | Alpha1 | Alpha2 | Theta | Alpha1 |
| Berdun 180 °C  | 0.605 | 1.985  | 0.100  | 0.291 | 0.826  | 0.117  | 0.296 | 0.297  |
| Igor 180 °C    | 1.497 | 0.850  | 0.573  | 0.317 | 0.588  | 0.106  | 0.231 | 0.246  |
| Teodor 180 °C  | 1.391 | 0.375  | 1.013  | 0.112 | 0.926  | 0.566  | 0.186 | 0.409  |
| Berdun 200 °C  | 0.431 | 1.960  | 0.265  | 1.875 | 0.134  | 0.564  | 1.285 | 0.045  |
| Loretto 200 °C | 1.717 | 0.938  | 1.022  | 0.873 | 1.016  | 3.034  | 1.131 | 0.090  |
| Berdun 220 °C  | 0.309 | 1.976  | 0.566  | 1.371 | 0.220  | 0.450  | 1.278 | 0.034  |
| Loretto 220 °C | 1.462 | 1.020  | 2.516  | 1.140 | 0.062  | 0.686  | 0.836 | 0.025  |

**Table 2.** R<sup>2</sup> of SRV models.

| Temperature | Variety | R <sup>2</sup> _TP | R <sup>2</sup> _ORAC | R <sup>2</sup> _FRAP |
|-------------|---------|--------------------|----------------------|----------------------|
| 180 °C      | Berdun  | 0.807              | 0.655                | -0.372               |
| 180 °C      | Teodor  | 0.021              | 0.500                | 0.387                |
| 180 °C      | Igor    | 0.396              | -0.404               | -2.081               |
| 200 °C      | Berdun  | 0.893              | 0.716                | -0.266               |
| 200 °C      | Loretto | 0.952              | -2.051               | 0.935                |
| 220 °C      | Berdun  | 0.632              | 0.712                | 0.423                |
| 220 °C      | Loretto | 0.919              | 0.844                | 0.881                |



**Supplementary Figure 1.** Linear correlation graph of the proximal composition (protein, fiber and fat), colorimetry Luminosity, A and B) and antioxidant parameters (TP, ORAC and FRAP).

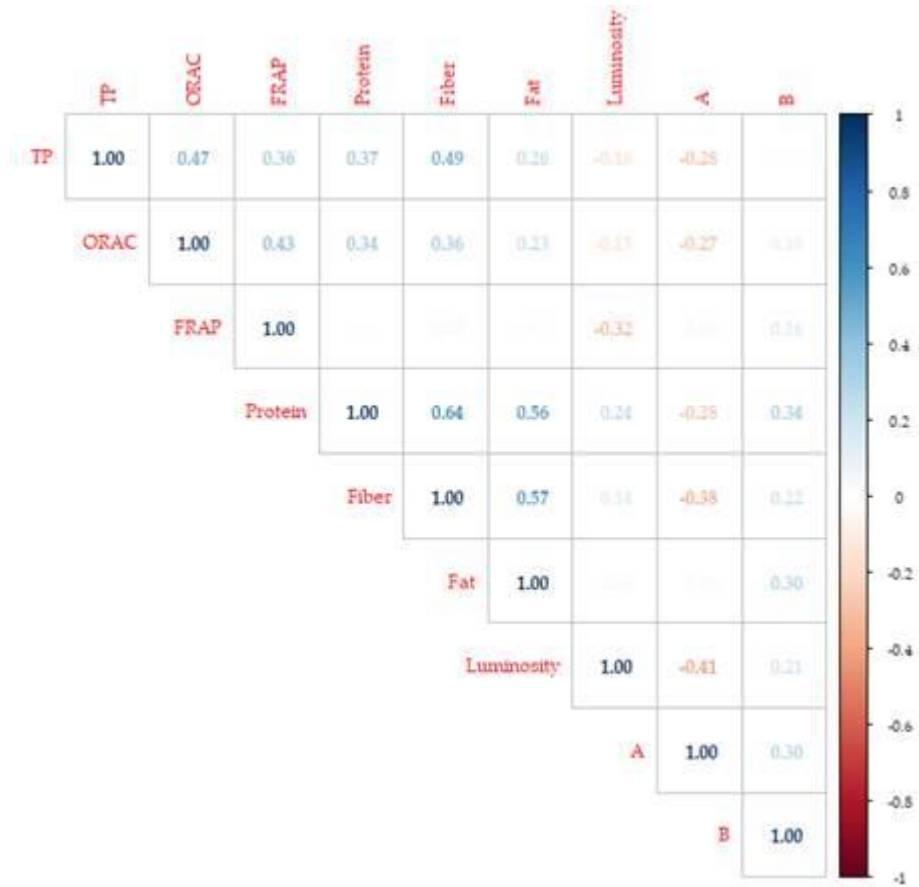

**Supplementary Figure 2.** Residues of the level of TP (I-III), ORAC (IV-VI) and FRAP (VII-IX) predicted with the second level models for the series according to baking temperature.

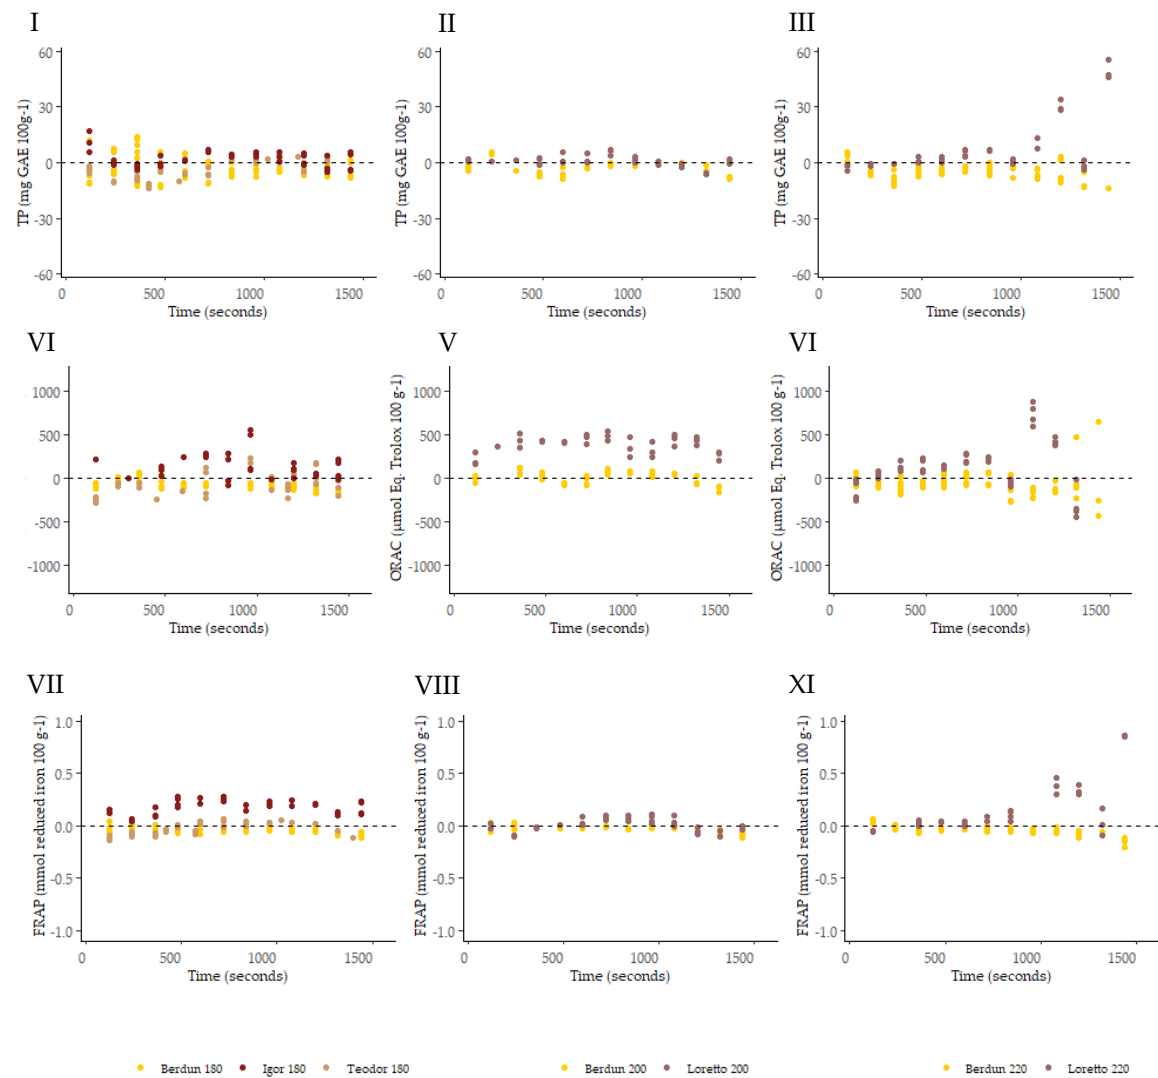

**Supplementary Table 1.** Silhouette coefficients for each grain type and antioxidant parameter.

| Grain type | TP Silhouette | ORAC Silhouette | FRAP Silhouette |
|------------|---------------|-----------------|-----------------|
| Chickpea   | -0.106        | -0.232          | -0.0355         |
| Corn       | -0.426        | -0.225          | -0.731          |
| Lentil     | 0.633         | 0.364           | -0.717          |
| Oatmeal    | -0.585        | -0.498          | -0.897          |
| Pea        | -0.559        | -0.377          | 0.707           |
| Rice       | 0.170         | -0.464          | -0.666          |
| Rye        | 0.276         | -0.480          | 0.132           |
| Sorghum    | -0.490        | -0.388          | 0.166           |
| Soy        | 0.490         | -0.218          | -0.363          |
| Triticale  | 0.203         | 0.334           | 0.542           |
| Wheat      | -0.0333       | 0.0155          | -0.717          |

**Supplementary Table 2.** Training dataset for the SVM model that predicts the value of theta in TP modelling.

| Variety         | Temp_scaled | Grain | Prot_scaled | Fibre_scaled | Theta | IC 95%         |
|-----------------|-------------|-------|-------------|--------------|-------|----------------|
| Berdun 180 ° C  | 10.251      | 0     | -0.502      | -1.984       | 0.605 | [0.507, 0.685] |
| Berdun 200 ° C  | 11.390      | 0     | -0.502      | -1.984       | 0.431 | [0.289, 0.575] |
| Berdun 220 ° C  | 12.529      | 0     | -0.502      | -1.984       | 0.309 | [0.214, 0.406] |
| Loretto 200 ° C | 11.390      | 1     | -1.314      | 1.272        | 1.717 | [1.583, 1.848] |
| Loretto 220 ° C | 12.529      | 1     | -1.314      | 1.272        | 1.462 | [1.340, 1.584] |
| Igor 180 ° C    | 10.251      | 1     | -0.170      | 0.778        | 1.497 | [1.329, 1.667] |
| Teodor 180 ° C  | 10.251      | 1     | -0.382      | 1.084        | 1.391 | [1.237, 1.534] |

**Supplementary Table 3.** Training dataset for the SVM model that predicts the value of alpha1 in TP modelling.

| Variety         | Temp_scaled | Grain | Prot_scaled | Fibre_scaled | Alpha1 | IC 95%         |
|-----------------|-------------|-------|-------------|--------------|--------|----------------|
| Berdun 180 ° C  | 10.251      | 0     | -0.502      | -1.984       | 1.985  | [1.771, 2.214] |
| Berdun 200 ° C  | 11.390      | 0     | -0.502      | -1.984       | 1.960  | [1.630, 2.290] |
| Berdun 220 ° C  | 12.529      | 0     | -0.502      | -1.984       | 1.976  | [1.706, 2.241] |
| Loretto 200 ° C | 11.390      | 1     | -1.314      | 1.272        | 0.938  | [0.599, 1.276] |
| Loretto 220 ° C | 12.529      | 1     | -1.314      | 1.272        | 1.020  | [0.718, 1.330] |
| Igor 180 ° C    | 10.251      | 1     | -0.170      | 0.778        | 0.850  | [0.500, 1.200] |
| Teodor 180 ° C  | 10.251      | 1     | -0.382      | 1.084        | 0.375  | [0.068, 0.713] |

**Supplementary Table 4.** Training dataset for the SVM model that predicts the value of alpha2 in TP modelling.

| Variety         | Temp_scaled | Grain | Prot_scaled | Fibre_scaled | Alpha2 | IC 95%         |
|-----------------|-------------|-------|-------------|--------------|--------|----------------|
| Berdun 180 ° C  | 10.251      | 0     | -0.502      | -1.984       | 0.100  | [0.006, 0.269] |
| Berdun 200 ° C  | 11.390      | 0     | -0.502      | -1.984       | 0.265  | [0.093, 0.442] |
| Berdun 220 ° C  | 12.529      | 0     | -0.502      | -1.984       | 0.566  | [0.460, 0.670] |
| Loretto 200 ° C | 11.390      | 1     | -1.314      | 1.272        | 1.022  | [0.869, 1.176] |
| Loretto 220 ° C | 12.529      | 1     | -1.314      | 1.272        | 2.516  | [2.430, 2.605] |
| Igor 180 ° C    | 10.251      | 1     | -0.170      | 0.778        | 0.573  | [0.293, 0.853] |
| Teodor 180 ° C  | 10.251      | 1     | -0.382      | 1.084        | 1.013  | [0.657, 1.387] |

**Supplementary Table 5.** Cost and R<sup>2</sup> for TP, ORAC and FRAP SVM models.

| Model           | Cost | R <sup>2</sup> |
|-----------------|------|----------------|
| SVR Theta TP    | 1    | 0.98           |
| SVR Alpha1 TP   | 2    | 0.96           |
| SVR Alpha2 TP   | 3    | 0.93           |
| SVR Theta ORAC  | 2    | 0.91           |
| SVR Alpha1 ORAC | 2.5  | 0.94           |
| SVR Alpha2 ORAC | 3.5  | 0.90           |
| SVR Theta FRAP  | 2.5  | 0.92           |
| SVR Alpha1 FRAP | 2    | 0.94           |
| SVR Alpha2 FRAP | 2.5  | 0.92           |

**Supplementary Table 6.** Values corresponding to the main parameters of the ORAC model.

| Variety        | Theta | IC 95%         | Alpha1 | IC 95%         | Alpha2 | IC 95%         |
|----------------|-------|----------------|--------|----------------|--------|----------------|
| Berdun 180 °C  | 0.290 | [0.172, 0.385] | 0.826  | [0.580, 1.103] | 0.117  | [0.006, 0.359] |
| Berdun 200 °C  | 0.317 | [0.175, 0.437] | 0.588  | [0.267, 0.930] | 0.106  | [0.006, 0.308] |
| Berdun 220 °C  | 0.112 | [0.020, 0.215] | 0.926  | [0.677, 1.156] | 0.566  | [0.445, 0.678] |
| Loretto 200 °C | 1.875 | [1.733, 1.989] | 0.134  | [0.006, 0.449] | 0.564  | [0.377, 0.765] |
| Loretto 220 °C | 0.873 | [0.738, 1.010] | 1.016  | [0.685, 1.352] | 3.034  | [2.909, 3.160] |
| Igor 180 °C    | 1.371 | [1.181, 1.511] | 0.220  | [0.010, 0.699] | 0.451  | [0.127, 0.813] |
| Teodor 180 °C  | 1.140 | [1.014, 1.250] | 0.062  | [0.002, 0.268] | 0.686  | [0.405, 0.978] |



**Supplementary Table 7.** Values corresponding to the main parameters of the FRAP model.

| Variety        | Theta | IC 95%         | Alpha1 | IC 95%         | Alpha2 | IC 95%         |
|----------------|-------|----------------|--------|----------------|--------|----------------|
| Berdun 180 °C  | 0.296 | [0.215, 0.360] | 0.297  | [0.133, 0.474] | 0.059  | [0.003, 0.206] |
| Berdun 200 °C  | 0.231 | [0.125, 0.315] | 0.246  | [0.040, 0.489] | 0.061  | [0.003, 0.191] |
| Berdun 220 °C  | 0.186 | [0.099, 0.272] | 0.409  | [0.203, 0.615] | 0.292  | [0.202, 0.385] |
| Loretto 200 °C | 1.285 | [1.203, 1.358] | 0.045  | [0.002, 0.207] | 1.020  | [0.895, 1.149] |
| Loretto 220 °C | 1.131 | [1.041, 1.208] | 0.090  | [0.004, 0.335] | 2.658  | [2.581, 2.738] |
| Igor 180 °C    | 1.278 | [1.199, 1.346] | 0.034  | [0.001, 0.159] | 0.680  | [0.478, 0.878] |
| Teodor 180 °C  | 0.836 | [0.767, 0.899] | 0.025  | [0.001, 0.127] | 0.755  | [0.430, 1.086] |
